# Supplementary material for: Systematic review of prognostic models in traumatic brain injury
Source: PubMed Central journal article supplement (PMC1657003; doi:10.1186/1472-6947-6-38), 2006-11-14
Supplement: 1472-6947-6-38-S4.pdf [file 1472-6947-6-38-S4.pdf]

**General characteristics of the models**

| <b>Study number</b> | <b>Author</b> | <b>Year of publication</b> | <b>Age group</b> | <b>Severity</b> | <b>Objective</b> | <b>Outcome</b> | <b>Multivariable analysis</b> | <b>N° of patients included</b> |
|---------------------|---------------|----------------------------|------------------|-----------------|------------------|----------------|-------------------------------|--------------------------------|
| 1                   | choi          | 1991                       | nr               | severe          | develop          | GOS            | CART                          | 555                            |
| 2                   | feldman       | 1991                       | nr               | all             | validate         | mortality      | na                            | 479                            |
| 2                   | feldman       | 1991                       | nr               | all             | validate         | mortality      | na                            | 131                            |
| 3                   | benzer        | 1991                       | all              | severe          | validate         | mortality      | na                            | 421                            |
| 4                   | zagara        | 1991                       | adults           | severe          | validate         | mortality      | na                            | 76                             |
| 5                   | vilalta       | 1992                       | all              | severe          | develop          | mortality      | logistic                      | 173                            |
| 6                   | ross          | 1992                       | all              | severe          | validate         | GOS            | na                            | 503                            |
| 7                   | fearnside     | 1993                       | all              | severe          | develop          | mortality      | logistic                      | 315                            |
| 7                   | fearnside     | 1993                       | all              | severe          | develop          | functional     | logistic                      | 315                            |
| 8                   | walder        | 1995                       | adults           | severe          | validate         | GOS            | na                            | 109                            |
| 9                   | temkin        | 1995                       | nr               | all             | develop          | functional     | CART                          | 448                            |
| 9                   | temkin        | 1995                       | nr               | all             | develop          | functional     | CART                          | 448                            |
| 9                   | temkin        | 1995                       | nr               | all             | develop          | functional     | CART                          | 448                            |
| 9                   | temkin        | 1995                       | nr               | all             | develop          | functional     | CART                          | 448                            |
| 9                   | temkin        | 1995                       | nr               | all             | develop          | functional     | CART                          | 448                            |
| 9                   | temkin        | 1995                       | nr               | all             | develop          | functional     | CART                          | 448                            |
| 10                  | cooke         | 1995                       | nr               | severe          | validate         | GOS            | na                            | 131                            |
| 11                  | mamelak       | 1996                       | all              | severe          | develop          | GOS            | logistic                      | 672                            |
| 12                  | combes        | 1996                       | nr               | severe          | develop          | GOS            | logistic                      | 198                            |
| 13                  | zafonte       | 1996                       | adults           | all             | validate         | functional     | na                            | 501                            |
| 14                  | lang          | 1997                       | all              | severe          | develop          | mortality      | logistic                      | 799                            |
| 14                  | lang          | 1997                       | all              | severe          | develop          | mortality      | logistic                      | 799                            |
| 14                  | lang          | 1997                       | all              | severe          | develop          | mortality      | neural network                | 799                            |
| 14                  | lang          | 1997                       | all              | severe          | develop          | mortality      | neural network                | 799                            |
| 15                  | cho           | 1997                       | adults           | all             | validate         | mortality      | na                            | 200                            |
| 15                  | cho           | 1997                       | adults           | all             | validate         | mortality      | na                            | 200                            |
| 15                  | cho           | 1997                       | adults           | all             | validate         | mortality      | na                            | 200                            |
| 15                  | cho           | 1997                       | adults           | all             | validate         | functional     | na                            | 200                            |
| 15                  | cho           | 1997                       | adults           | all             | validate         | mortality      | na                            | 200                            |
| 15                  | cho           | 1997                       | adults           | all             | validate         | mortality      | na                            | 200                            |
| 15                  | cho           | 1997                       | adults           | all             | validate         | mortality      | na                            | 200                            |
| 15                  | cho           | 1997                       | adults           | all             | validate         | mortality      | na                            | 200                            |
| 15                  | cho           | 1997                       | adults           | all             | validate         | functional     | na                            | 200                            |
| 16                  | alvarez       | 1998                       | adults           | all             | validate         | mortality      | na                            | 247                            |
| 16                  | alvarez       | 1998                       | adults           | all             | validate         | mortality      | na                            | 247                            |



| <i>Study number</i> | <i>Author</i> | <i>Year of publication</i> | <i>Age group</i> | <i>Severity</i>     | <i>Objective</i> | <i>Outcome</i>             | <i>Multivariable analysis</i> | <i>N° of patients included</i> |
|---------------------|---------------|----------------------------|------------------|---------------------|------------------|----------------------------|-------------------------------|--------------------------------|
| 29                  | wagner        | 2000                       | adults           | all                 | validate         | functional                 | na                            | 378                            |
| 30                  | wagner        | 2000                       | adults           | all                 | validate         | functional                 | na                            | 378                            |
| 30                  | wagner        | 2000                       | adults           | all                 | validate         | functional                 | na                            | 378                            |
| 31                  | adachi        | 2000                       | all              | nr                  | nr               | GOS                        | linear discriminant analysis  | 63                             |
| 32                  | schaan        | 2001                       | all              | nr                  | develop          | GOS                        | not clear                     | 554                            |
| 33                  | schreiber     | 2002                       | adults           | severe              | develop          | mortality                  | logistic                      | 368                            |
| 34                  | ratanalert    | 2002                       | all              | severe              | develop          | GOS                        | logistic                      | 337                            |
| 35                  | andrews       | 2002                       | all              | all                 | develop          | GOS                        | CART                          | 124                            |
| 35                  | andrews       | 2002                       | all              | all                 | develop          | GOS                        | CART                          | 124                            |
| 35                  | andrews       | 2002                       | all              | all                 | develop          | GOS                        | CART                          | 124                            |
| 36                  | heard         | 2002                       | children         | nr                  | validate         | mortality                  | na                            | 119                            |
| 37                  | pillai        | 2003                       | adults           | severe              | develop          | GOS                        | logistic                      | 289                            |
| 38                  | tender        | 2003                       | all              | mild                | develop          | GOS                        | no                            | 255                            |
| 39                  | brenner       | 2003                       | children         | severe              | develop          | functional                 | discriminant analysis         | 22                             |
| 39                  | brenner       | 2003                       | children         | severe              | develop          | functional                 | linear discriminant analysis  | 22                             |
| 39                  | brenner       | 2003                       | children         | severe              | develop          | functional                 | discriminant analysis         | 22                             |
| 40                  | cassidi       | 2003                       | children         | all                 | develop          | functional                 | logistic                      | 3491                           |
| 41                  | bush          | 2003                       | adults           | all                 | validate         | functional                 | na                            | 294                            |
| 42                  | rovlias       | 2004                       | adults           | severe              | develop          | GOS                        | CART                          | 345                            |
| 43                  | ibañez        | 2004                       | adults           | mild                | develop          | CT scan lesion             | logistic                      | 1101                           |
| 43                  | ibañez        | 2004                       | adults           | mild                | develop          | CT scan lesion             | logistic                      | 1101                           |
| 43                  | ibañez        | 2004                       | adults           | mild                | develop          | CT scan lesion             | CART                          | 1101                           |
| 43                  | ibañez        | 2004                       | adults           | mild                | develop          | CT scan lesion             | CART                          | 1101                           |
| 44                  | demetriades   | 2004                       | all              | severe and moderate | validate         | mortality                  | na                            | 7764                           |
| 45                  | fabrri        | 2004                       | adults           | mild                | develop          | CT scan lesion             | logistic                      | 5578                           |
| 45                  | fabrri        | 2004                       | adults           | mild                | develop          | neurosurgical intervention | logistic                      | 5578                           |
| 45                  | fabrri        | 2004                       | adults           | mild                | develop          | GOS                        | logistic                      | 5578                           |

| <i>Study number</i> | <i>Author</i> | <i>Year of publication</i> | <i>Age group</i> | <i>Severity</i>     | <i>Objective</i> | <i>Outcome</i>             | <i>Multivariable analysis</i> | <i>N° of patients included</i> |
|---------------------|---------------|----------------------------|------------------|---------------------|------------------|----------------------------|-------------------------------|--------------------------------|
| 46                  | carter        | 2005                       | children         | severe              | develop          | GOS                        | na                            | 102                            |
| 47                  | levin         | 2005                       | adults           | mild                | develop          | functional                 | logistic                      | 129                            |
| 48                  | eftekhar      | 2005                       | adults           | all                 | develop          | mortality                  | logistic                      | 1271                           |
| 48                  | eftekhar      | 2005                       | adults           | all                 | develop          | mortality                  | neural network                | 1271                           |
| 49                  | hsu           | 2005                       | all              | severe and moderate | develop          | GOS                        | neural network                | 3345                           |
| 50                  | wechsler      | 2005                       | children         | all                 | develop          | functional                 | logistic                      | 4439                           |
| 50                  | wechsler      | 2005                       | children         | all                 | develop          | functional                 | logistic                      | 4439                           |
| 51                  | poon          | 2005                       | nr               | severe and moderate | develop          | GOS                        | logistic                      | 68                             |
| 52                  | hukkelhoven   | 2005                       | nr               | severe and moderate | develop          | neurosurgical intervention | logistic                      | 275                            |
| 52                  | hukkelhoven   | 2005                       | nr               | severe and moderate | develop          | raised IPC                 | logistic                      | 275                            |
| 53                  | hukkelhoven   | 2005                       | nr               | severe and moderate | develop          | GOS                        | logistic                      | 2269                           |
| 53                  | hukkelhoven   | 2005                       | nr               | severe and moderate | develop          | mortality                  | logistic                      | 2269                           |
